# Supplementary material for: Green synthesis of silver nanoplates using the special category of plant leaves showing the lotus effect
Source: Royal Society of Chemistry journal article supplement (doi:10.1039/d0ra06533a), 2020-01-01
Supplement: d0ra06533a1.pdf [file d0ra06533a1.pdf]

## Supplementary information

### Green synthesis of silver nanoplates using special category of plant leaves showing lotus effect

Sangeeta Agarwal<sup>a\*</sup>, Manisha Gogoi<sup>a</sup>, Smritirekha Talukdar<sup>a</sup>, Pinky Bora<sup>b</sup>, Tarun Kumar Basumatary<sup>b</sup> and N. Nirjanta Devi<sup>b</sup>

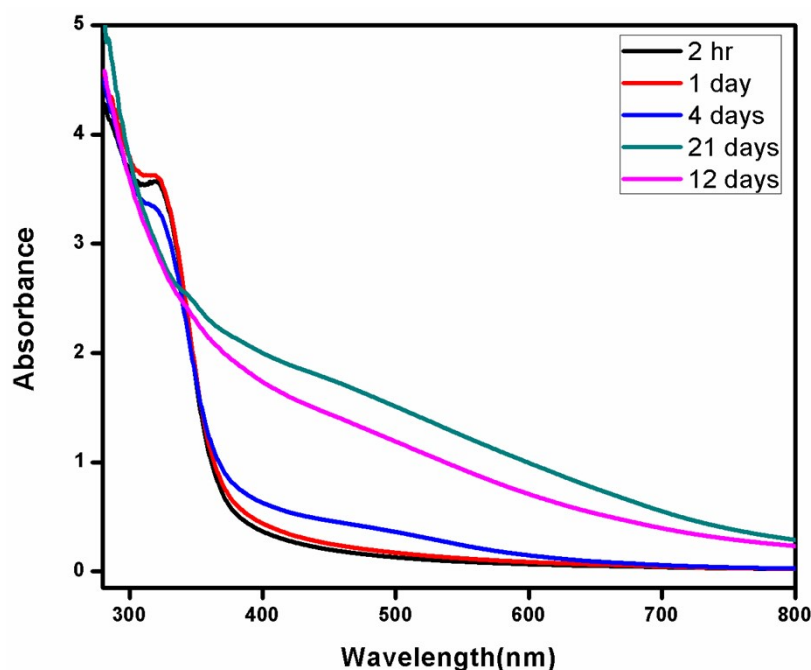

Figure S1: UV – Vis spectra of silver nanoplates synthesized using AgNO<sub>3</sub> and *Eichornia crassipes* leaf extract (1:1 ratio) as a function of time

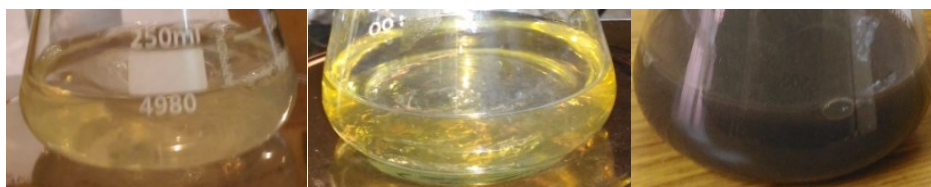

Figure S2: Successive colour changes during the synthesis of silver nanoplates synthesized using AgNO<sub>3</sub> and *Eichornia crassipes* leaf extract (1:1 ratio)

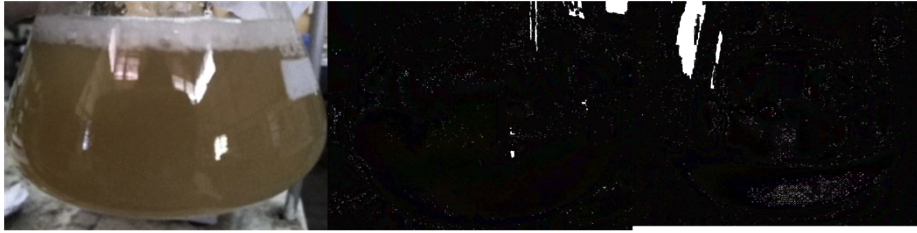

**Figure S3: Successive colour changes during the synthesis of silver nanoplates synthesized using *Colocasia esculenta* leaf extract and AgNO<sub>3</sub> (1:2 ratio)**

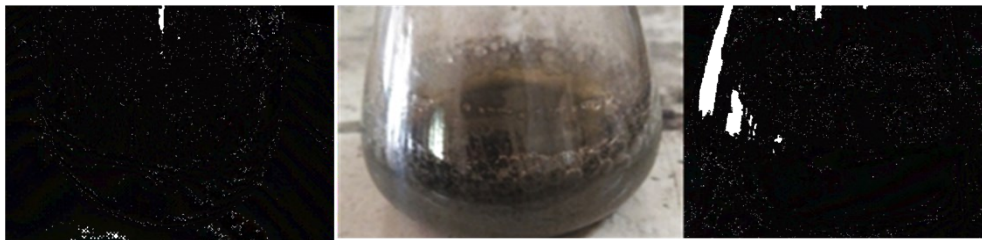

**Figure S4: Successive colour changes during the synthesis of silver nanoplates synthesized using AgNO<sub>3</sub> and *Nelumbo nucifera* leaf extract (1:1 ratio)**

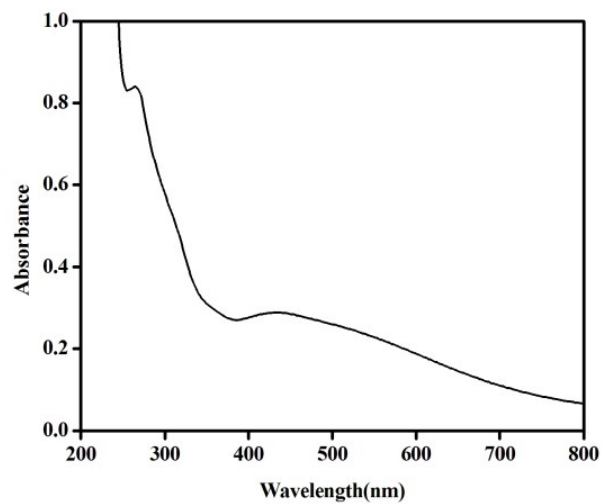

**Figure S5: UV – Vis spectra of silver nanoplates synthesized using *Nelumbo nucifera* leaf extract and AgNO<sub>3</sub> (1:2 ratios)**
